# Supplementary figures and images for: Modular microreactor with integrated reflection element for online reaction monitoring using infrared spectroscopy
Source: Royal Society of Chemistry journal article supplement (doi:10.1039/d0lc00704h), 2020-01-01

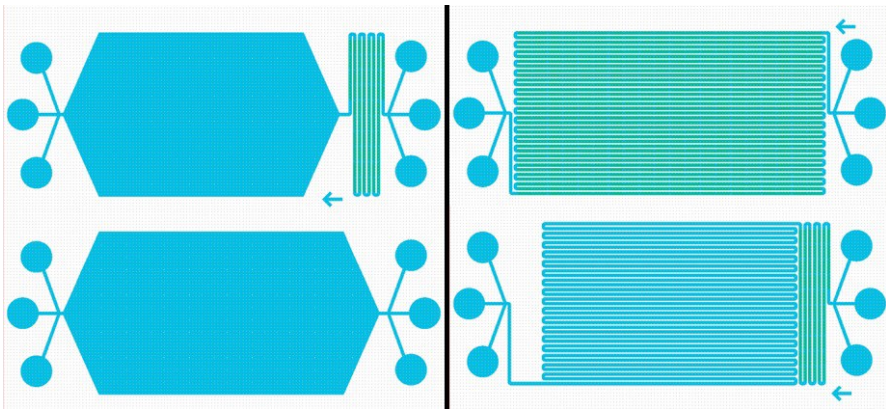

Supplement: d0lc00704h1.pdf [file d0lc00704h1.pdf]

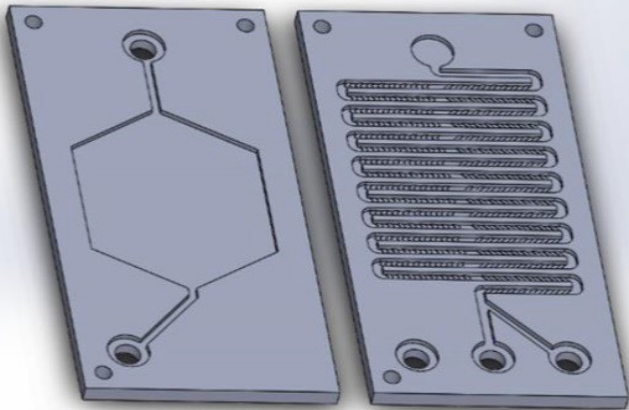

Supplement: d0lc00704h2.pdf [file d0lc00704h2.pdf]

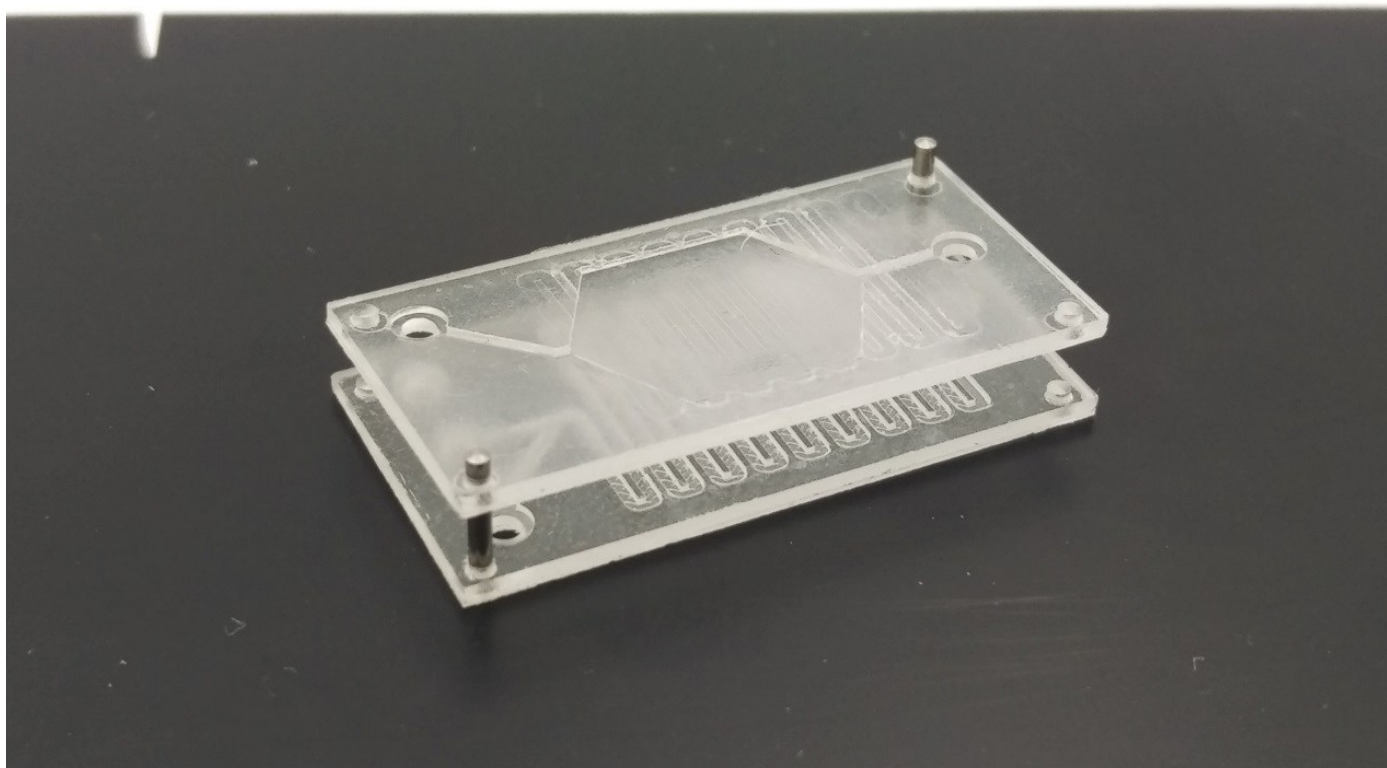

Supplement: d0lc00704h3.pdf [file d0lc00704h3.pdf]

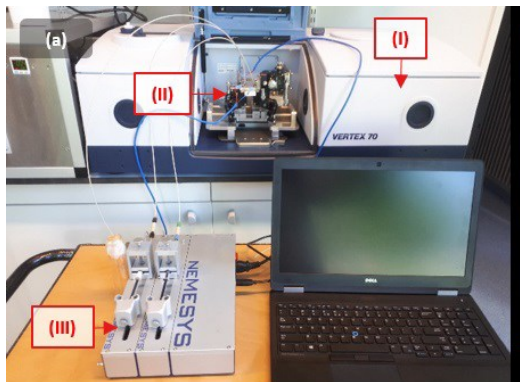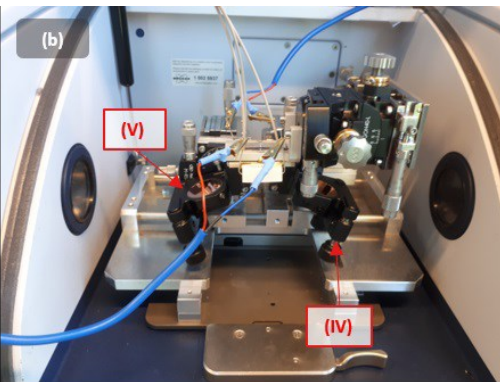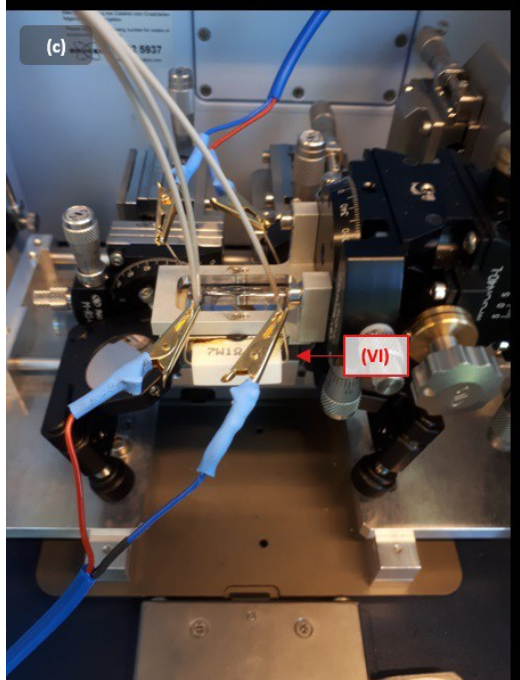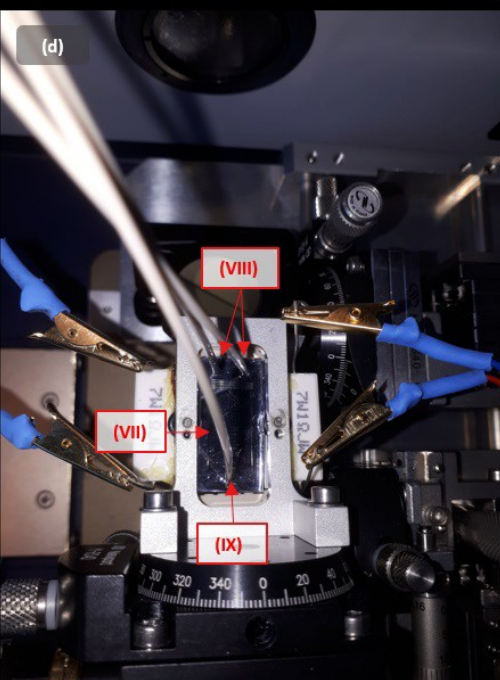

Supplement: d0lc00704h4.pdf [file d0lc00704h4.pdf]

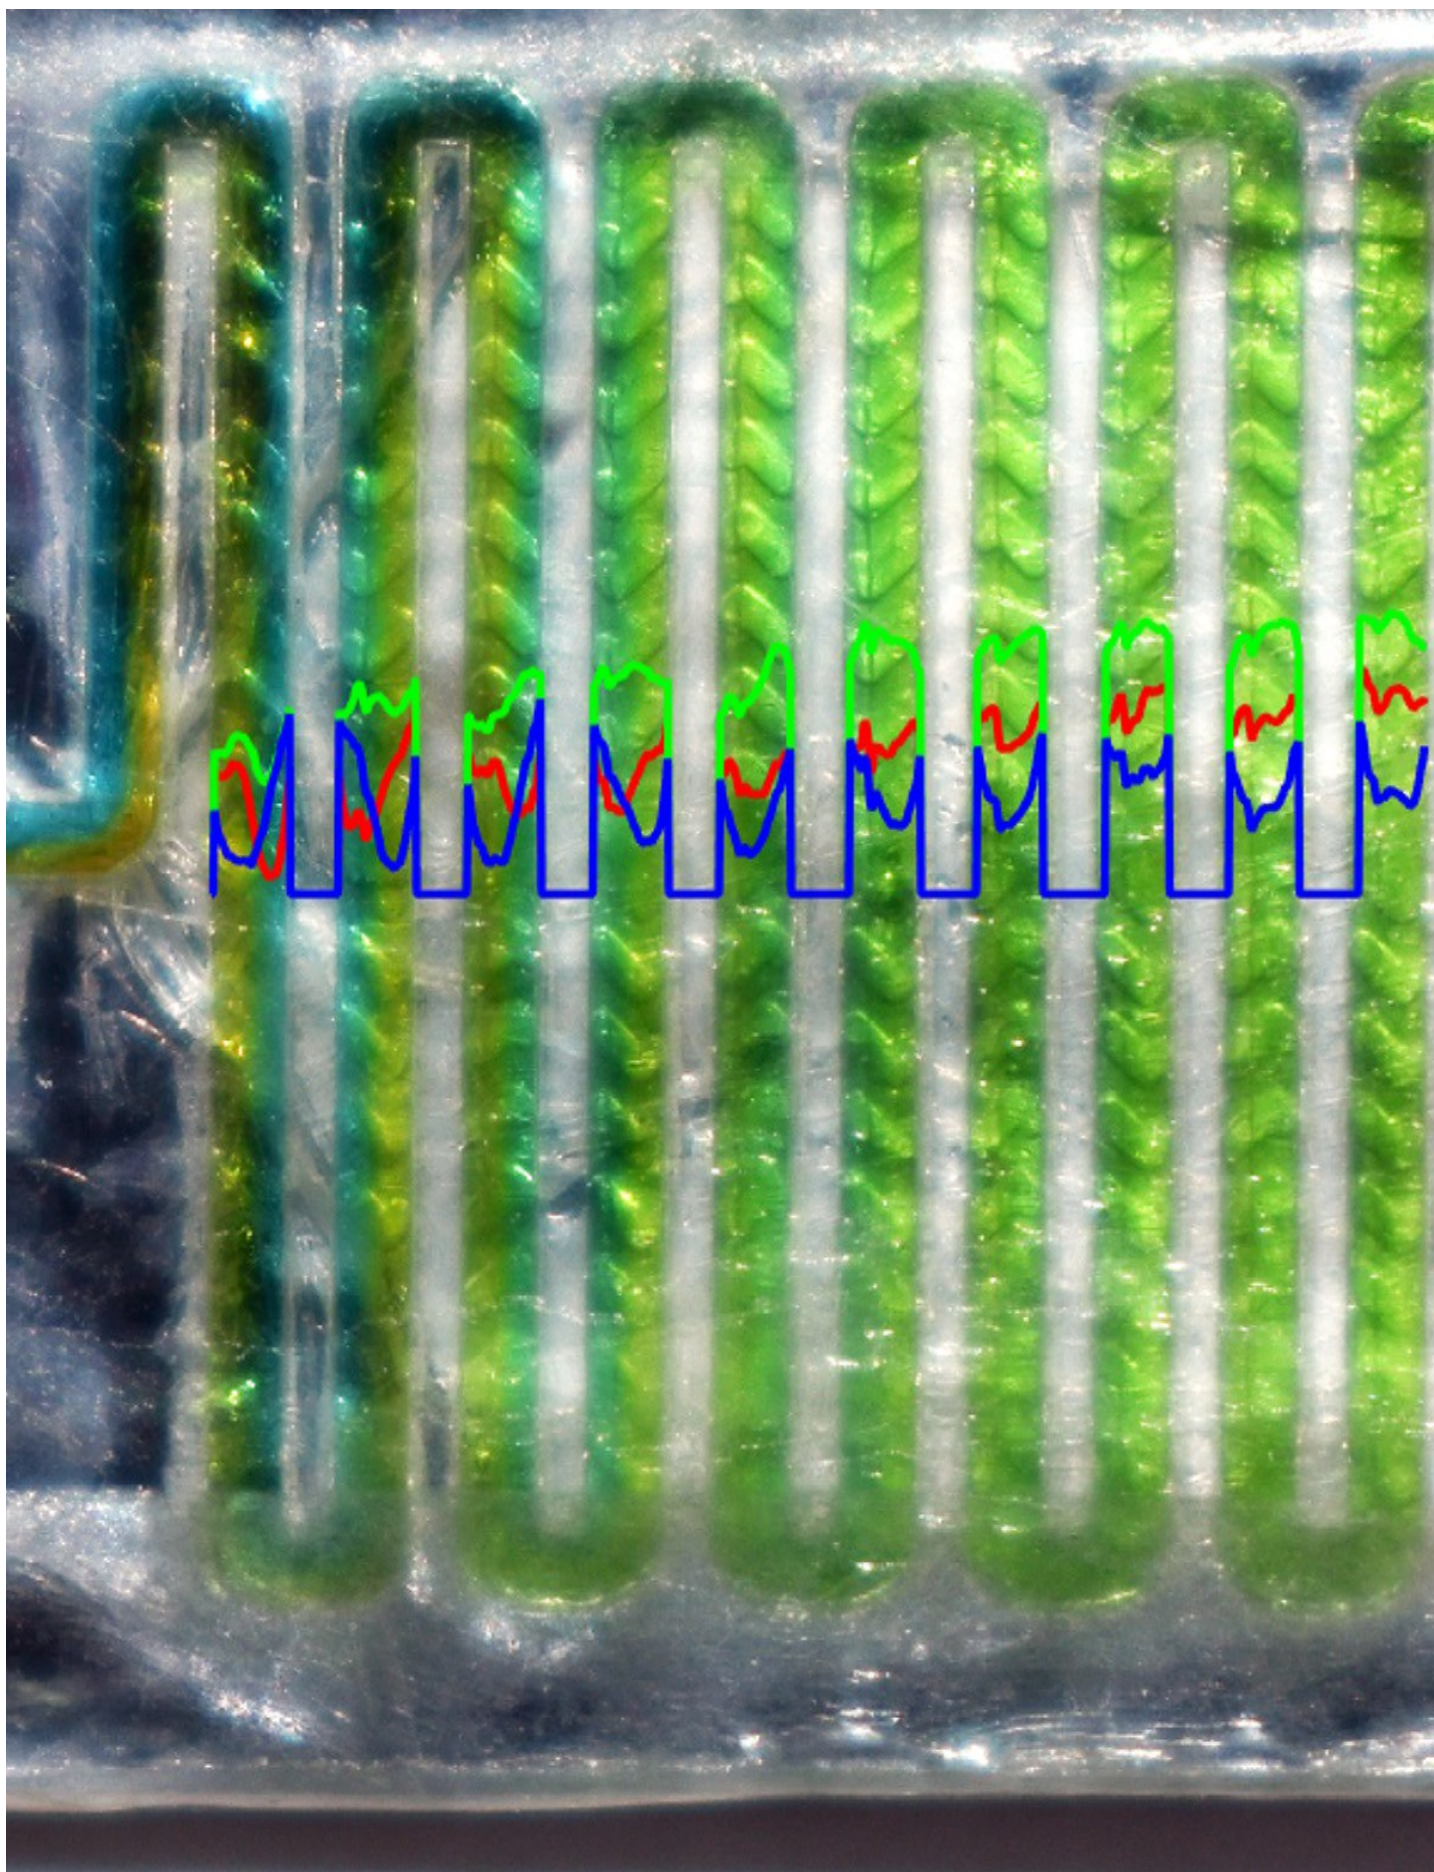

Supplement: d0lc00704h5.pdf [file d0lc00704h5.pdf]

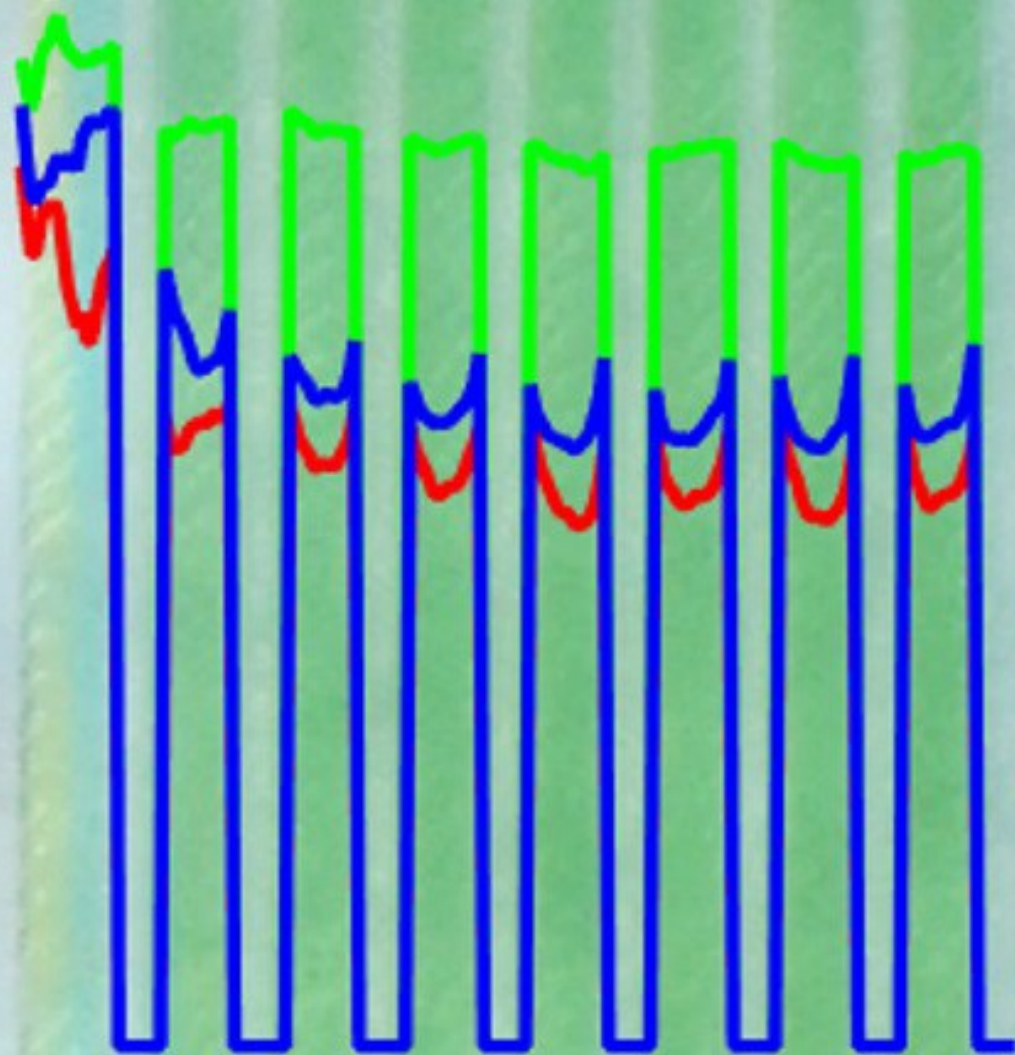

Supplement: d0lc00704h6.pdf [file d0lc00704h6.pdf]

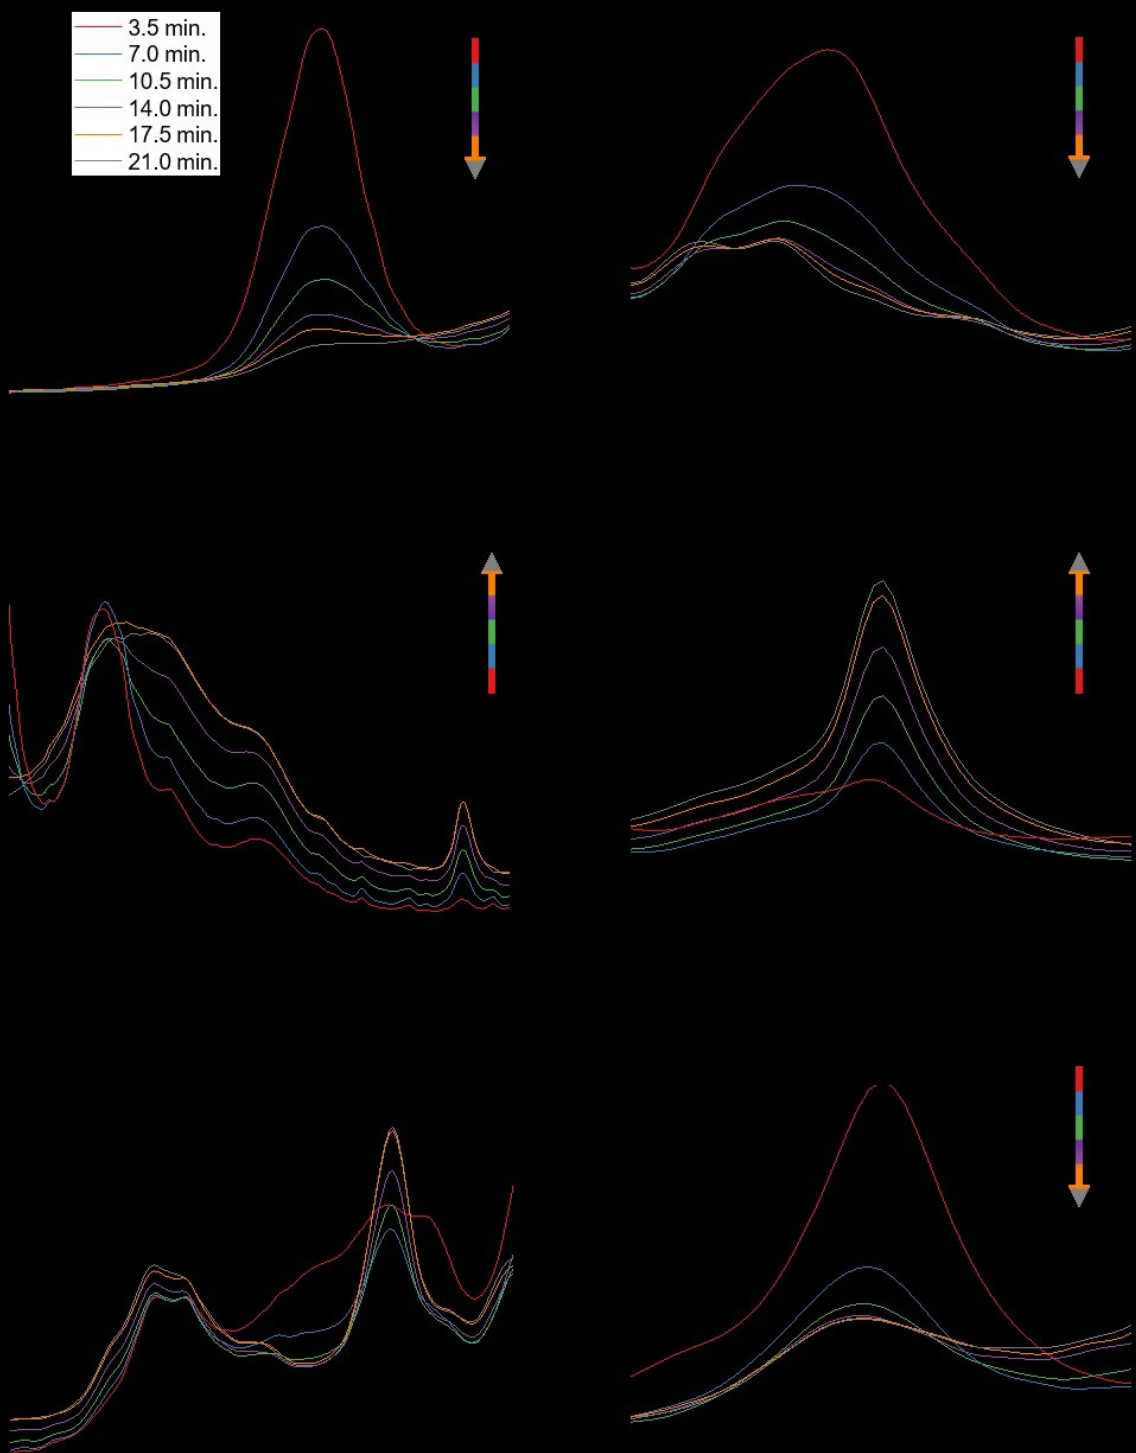

Supplement: d0lc00704h7.pdf [file d0lc00704h7.pdf]
